# Supplementary material for: N-Terminal-Based Targeted, Inducible Protein Degradation in Escherichia coli
Source: PubMed Central journal article supplement (PMC4765774; doi:10.1371/journal.pone.0149746), 2016-02-22
Supplement: pone.0149746.s007.pdf [file pone.0149746.s007.pdf]

# S1 File - Supplementary Information

for “N-terminal-based targeted, inducible protein degradation  
in *Escherichia coli*”

Sekar, K., Gentile, A.M., Bostick, J.W., and Tyo, K.E.J.

## Contents

|          |                                                                |          |
|----------|----------------------------------------------------------------|----------|
| <b>1</b> | <b>Molecular Cloning Information</b>                           | <b>2</b> |
| 1.1      | Plasmids . . . . .                                             | 2        |
| 1.2      | Ntag Protein Sequence . . . . .                                | 2        |
| <b>2</b> | <b>Plasmid, Strain, and Construction Information</b>           | <b>3</b> |
| <b>3</b> | <b>Supplemental Methods</b>                                    | <b>7</b> |
| 3.1      | Purification of MBP-Ntag-RFP . . . . .                         | 7        |
| 3.2      | Methods for Time Course Westerns . . . . .                     | 7        |
| <b>4</b> | <b>Back of the envelope calculations for degradation rates</b> | <b>8</b> |
| 4.1      | Ntag-mCherry calculation . . . . .                             | 8        |
| 4.2      | Ntag-beta-galactosidase calculation . . . . .                  | 8        |
| 4.3      | arcA-ssrA calculation . . . . .                                | 9        |

# 1 Molecular Cloning Information

## 1.1 Plasmids

All plasmids GenBank files are included separately in ZIP file. Plasmid kits available from AddGene.

## 1.2 Ntag Protein Sequence

MSITSLYKKAGSENLYFQFHKSGAWKLPVSLVKRGIDKLDYKEQLQAWRWEREIDERN  
RPLSDEELDAMFPEGYKVLPPPAGYVPIRTPAHMDRIPAARTTENSSDYKDDDDK  
... (start of protein)

Features:

FLAG tag in green

Linker in black

## 2 Plasmid, Strain, and Construction Information

**Table A:** Strains used in this study.

| Name                | Genotype                                                | Resistance | Purpose                                                                                                                           |
|---------------------|---------------------------------------------------------|------------|-----------------------------------------------------------------------------------------------------------------------------------|
| MG1655 Z1           | F-, lambda-, rph-1, lacIq, PN25-tetR, SpR               | (none)     | E. coli MG1655 Z1 host that produces constitutive levels of TetR, LacI and AraC from the chromosome                               |
| MG1655 Z1 malE      | F-, lambda-, rph-1, lacIq, PN25-tetR, SpR, malE-        | (none)     | E. coli MG1655 Z1 host that produces constitutive levels of TetR, LacI and AraC from the chromosome with additional malE KO       |
| MG1655 Z1 malE clpP | F-, lambda-, rph-1, lacIq, PN25-tetR, SpR, malE-, clpP- | (none)     | E. coli MG1655 Z1 host that produces constitutive levels of TetR, LacI and AraC from the chromosome with additional malE, clpP KO |
| MG1655 Z1 malE aat  | F-, lambda-, rph-1, lacIq, PN25-tetR, SpR, malE-, aat-  | (none)     | E. coli MG1655 Z1 host that produces constitutive levels of TetR, LacI and AraC from the chromosome with additional malE, aat KO  |
| MG1655 Z1 malE clpA | F-, lambda-, rph-1, lacIq, PN25-tetR, SpR, malE-, clpA- | (none)     | E. coli MG1655 Z1 host that produces constitutive levels of TetR, LacI and AraC from the chromosome with additional malE, clpA KO |
| MG1655 Z1 malE clpS | F-, lambda-, rph-1, lacIq, PN25-tetR, SpR, malE-, clpS- | (none)     | E. coli MG1655 Z1 host that produces constitutive levels of TetR, LacI and AraC from the chromosome with additional malE, clpS KO |
| MG1655 Z1 malE clpX | F-, lambda-, rph-1, lacIq, PN25-tetR, SpR, malE-, clpX- | (none)     | E. coli MG1655 Z1 host that produces constitutive levels of TetR, LacI and AraC from the chromosome with additional malE, clpX KO |
| MG1655 Z1 malE sspB | F-, lambda-, rph-1, lacIq, PN25-tetR, SpR, malE-, sspB- | (none)     | E. coli MG1655 Z1 host that produces constitutive levels of TetR, LacI and AraC from the chromosome with additional malE, sspB KO |

**Table B:** Plasmids used in this study.

| Short Name and Insert   | Plasmid Name | Description                                       | Backbone        | Antibiotic | Promoter |
|-------------------------|--------------|---------------------------------------------------|-----------------|------------|----------|
| MBP-Ntag-RFP            | pKS011       | Construct made for cleavage experiments.          | pSB4C5 (pSC101) | Cm (low)   | PI TetO  |
| Ntag-RFP                | pKS012       | Testing Ntag degradation on mCherry               | pSB4C5 (pSC101) | Cm (low)   | PI TetO  |
| RFP                     | pKS013       | Negative control mCherry                          | pSB4C5 (pSC101) | Cm (low)   | PI TetO  |
| Ntag-beta galactosidase | pKS014       |                                                   | pSB4C5 (pSC101) | Cm (low)   | PI TetO  |
| pTrc                    | pTrc         | Empty pTrcHis2B plasmid                           | n/a             | Amp        | Trc      |
| GFP                     | pJB005       | pTrc plasmid expressing GFP on IPTG addition      | ptrc            | Amp        | Trc      |
| TEV                     | pJB028       | pTrc plasmid expressing p14*-TEV on IPTG addition | ptrc            | Amp        | Trc      |
| clpA                    | pKS042       | pTrc plasmid expressing clpA on IPTG addition     | ptrc            | Amp        | Trc      |
| clpS                    | pKS043       | pTrc plasmid expressing clpS on IPTG addition     | ptrc            | Amp        | Trc      |
| clpP                    | pKS044       | pTrc plasmid expressing clpP on IPTG addition     | ptrc            | Amp        | Trc      |

**Table C:** Construction Oligonucleotides

| Primer Name | Purpose                                              | 5' to 3' sequence                                             | Template                            |
|-------------|------------------------------------------------------|---------------------------------------------------------------|-------------------------------------|
| KS139       | Constructing pKS011                                  | GCTGTACAAGTAATAAATATCCGGGTAGGCGCAA                            | Unpublished pSB4C5 (pSC101) plasmid |
| KS140       | Constructing pKS011                                  | CTGTTTTTATTTTCATGCGGTACCTTTCCTCT                              | Unpublished pSB4C5 (pSC101) plasmid |
| KS141       | Constructing pKS011                                  | GGAGAAAGGTACCGCATGAAAATAAAAACAGGTGCACG                        | pMAL-p5X (from NEB)                 |
| KS142       | Constructing pKS011                                  | CGTGATCGACCCGAGGTTGTTGTTATTG                                  | pMAL-p5X (from NEB)                 |
| KS143       | Constructing pKS011                                  | GACGATGACAAGATGGTGAGCAAGGGCGAG                                | gBlock synthesized from IDT         |
| KS144       | Constructing pKS011                                  | CGCCTACCCGGATATTTATTACTTGTACAGCTCGTCCATG                      | gBlock synthesized from IDT         |
| KS145       | Constructing pKS011                                  | CAACCTCGGGTCGATCAC                                            | Unpublished mCherry plasmid         |
| KS146       | Constructing pKS011                                  | CCTTGCTCACCATCTTGTC                                           | Unpublished mCherry plasmid         |
| KS147       | Constructing pKS012                                  | CGACATGCGGTACCTTTCCTCT                                        | pKS011                              |
| KS148       | Constructing pKS012                                  | AAGGTACCGCATGTCGATCACGTCGCTGTAT                               | pKS011                              |
| KS073       | Constructing pKS013                                  | CCTTGCTCACCATGCGGTACCTTTCCTCT                                 | pKS012                              |
| KS074       | Constructing pKS013                                  | AGAAAGGTACCGCATGGTGAGCAAGGGCGAG                               | pKS012                              |
| KS149       | Constructing pKS014                                  | TGGTCTGGTGTCAAAAATAAATATCCGGGTAGGCGCAATCACTTTCG               | pKS012                              |
| KS150       | Constructing pKS014                                  | TCCGTAATCATGGTCATCTTGTCATCGTCATCTTGTAGTCGC                    | pKS012                              |
| KS151       | Constructing pKS014                                  | TGACGATGACAAGATGACCATGATTACGGATTCCTGG                         | E. coli Genome                      |
| KS152       | Constructing pKS014                                  | TGCGCTACCCGGATATTTATTTTGGACACCAGACCAACTG                      | E. coli Genome                      |
| KS230       | Putting clp proteins into ptrc (inverse PCR)         | AGAGCTCGAGATCTGCAGCTGG                                        | pTrcHisB                            |
| KS231       | Putting clp proteins into ptrc (inverse PCR)         | CATCCTCTGGATCCATGGTTTATTCCTCC                                 | pTrcHisB                            |
| KS232       | Making pKS042 (clpA)                                 | GGAGGAATAAACCATGGATCCAGAGGATGCTCAATCAAGAACTGG                 | E. coli Genome                      |
| KS233       | Making pKS042 (clpA)                                 | CCAGCTGCAGATCTCGAGCTCTTAATGCGCTGCTTCCGCC                      | E. coli Genome                      |
| KS234       | Making pKS043 (clpS)                                 | GGAGGAATAAACCATGGATCCAGAGGATGGGTAAAACGAACGACTGGCTGG           | E. coli Genome                      |
| KS235       | Making pKS043 (clpS)                                 | CCAGCTGCAGATCTCGAGCTCTCAGGCTTTTTCTAGCGTACACAGC                | E. coli Genome                      |
| KS236       | Making pKS044 (clpP)                                 | GGAGGAATAAACCATGGATCCAGAGGATGTCATACAGCGGCGAAC                 | E. coli Genome                      |
| KS237       | Making pKS044 (clpP)                                 | CCAGCTGCAGATCTCGAGCTCTCAATTACGATGGGTGAGAATCGAATCG             | E. coli Genome                      |
| JB045       | Making pJB005 - Digest and Gibson into pTrc          | GACCGAATTCATTAAGAGGAGAAAGGTACCATGCGTAAAGGAGAAGAACTTTTCACTGGAG | pZE-GFP construct                   |
| JB046       | Making pJB005 - Digest and Gibson into pTrc          | CCTGCAGCTGCTCTTTGTATAGTTCATCCATGCCATGTGTAATCCC                | pZE-GFP construct                   |
| JB043       | Making pJB028 ancestor - Digest and Gibson into pTrc | CGATTAAATAAGGAGGAATAAACCATGGATCCAGAGGATGGCAATGCAGGCAGCAAAACG  | Synthesized Sequence                |
| JB044       | Making pJB028 ancestor - Digest and Gibson into pTrc | CCATATGGTACCAGCTGCAGATCTCGAGCTCTTACAGCTGGGTTGCTTCTTTAACCGGC   | Synthesized Sequence                |

**Table D:** Checking Oligonucleotides

| Primer Name | Purpose              | 5' to 3' sequence           |
|-------------|----------------------|-----------------------------|
| JB051 (s)   | TEV Chk              | GTAGCGCAATGGGTGAAAGCCTG     |
| JB052 (a)   | TEV Chk              | CTGGGTTGCTTCTTTAACCGGCTG    |
| JB053 (s)   | GFP Chk              | AAGAGTGCCATGCCCGAAGG        |
| JB054 (a)   | GFP Chk              | CCTTCGATTCCGACCTCATTAAGCAGC |
| KS076 (a)   | checking for mCherry | CATGTTATCCTCCTCGCCCTT       |
| KS077 (s)   | checking for mChery  | CCATCGTGGAACAGTACGAAC       |
| KS131(s)    | checking for MBP     | GTTAATAAAGACAAACCGCTGGGTGC  |
| KS132 (a)   | checking for MBP     | GCAACCTGTGGGAATTTCTCTTCC    |
| KS055 (s)   | checking for lacZ    | AAGGCACATGGCTGAATATCGAC     |
| KS022 (a)   | checking for lacZ    | ATGCGCTCAGGTCAAATTCAG       |
| JB071 (s)   | Target plasmid check | GGCGTATCACGAGGCCCTTTC       |
| KS056 (a)   | Target plasmid check | TCCTACTCAGGAGAGCGTTCAC      |
| JB011 (s)   | pTrc plasmid check   | TGTGGGCACTCGACCGGAATTATC    |
| KS191(a)    | pTrc plasmid check   | GGCGACACGGAAATGTTGAATAC     |
| KS186 (a)   | clpX checking        | CCCTGCGGTCAGCAAGAAAG        |
| KS187 (s)   | clpP checking        | CTGATCAAGTTTGGTCTTATCCCTGAG |
| KS189 (s)   | clpA checking        | ATAACAGCACCGATGCGATG        |

## 3 Supplemental Methods

### 3.1 Purification of MBP-Ntag-RFP

*E. coli* MG1655 K12  $\Delta malE$  was transformed with pKS011. An individual colony was picked and cultured in 50 mL in same conditions as described in Methods. The next day, the culture was chilled and kept cold throughout the consequent steps. The culture was homogenized using an EmulsiFlex-C5 homogenizer (Avestin, Ottawa, Canada) and settled for 40 minutes at 18,000g to remove cellular debris. MBP-Ntag-RFP was purified from supernatant using the ÄKTAexpress Twin FPLC system (General Electric, Fairfield, Connecticut) using the MBPTrap HP column (GE Healthcare Life Sciences, Fairfield, Connecticut). Purification protocol provided with column was used to perform purification. Protein was quantified using spectrophotometer and standards were prepared in the elution buffer.

### 3.2 Methods for Time Course Westerns

*E. coli* MG1655 K12  $\Delta malE$  were chemically transformed with pKS011 and pTrc or pJB028 (p14\*-TEV) perturbation plasmids. Colonies were grown on plates with respective antibiotics and used to seed 5mL LB at 37°C and 250RPM for overnight culture. Cells were subcultured to 0.05 OD<sub>600</sub> and allowed to grow until 0.6 OD<sub>600</sub>, upon which 1mM IPTG was added for the designated conditions. Cells were harvested before IPTG addition (t = 0h), after 1 hour, and after 3 hours. Cells were pelleted, resuspended in 500 $\mu$ L ice cold PBS with 2.5 $\mu$ L protease inhibitor cocktail (Sigma) and probe-tipped sonicated. Protein concentration was determined by Bradford assay (Biorad, Berkeley, CA) according to supplied protocol. 20  $\mu$ g protein was loaded into each well of an AnyKD polyacrylamide gel (Biorad, Berkeley, CA), electrophoretically separated, and transferred to PVDF (EMD Millipore, Billerica, MA) using Towbin's method. Membranes were blocked with 10% nonfat dry milk (Nestle USA, Washington, DC) in TBS-T and washed three times in a large volume of TBS-T for 10 minutes with gentle agitation. Proteins were visualized using a monoclonal mouse anti-FLAG primary antibody (Antibody Registry#: AB\_262044, Product No. F1804, Sigma Aldrich, St. Louis, MO) at a dilution of 1:1500. The anti-mouse HRP secondary antibodies (Cell Signaling Technology, Danvers, MA) at a dilution of 1:30000 was used for the next incubation. And finally the bands were visualized using the WesternC chemiluminescent substrate (Biorad, Berkeley, CA) on a ChemiDoc XRS+ (Biorad, Berkeley, CA). The experiment was also performed using a polyclonal rabbit anti-MBP primary antibody (Antibody Registry#: AB\_675709, Product No. sc-808, Santa Cruz Biotech, Santa Cruz, CA) on the same protein lysates at a 1:1500 concentration.

Anti-rabbit secondaries were used at the same concentration (1:30000). Dilutions were determined from Western optimization.

## 4 Back of the envelope calculations for degradation rates

### 4.1 Ntag-mCherry calculation

Numbers and assumptions:

- $\beta$  (from single plasmid experiments) - 1500 Fluorescence/OD hr
- conversion of Fluorescence/OD to protein/cell -10 (proteins/cell)/(fluorescence/OD) (from purified RFP standard curve)
- Residues in Ntag-mCherry - 350 residues/protein

$$(1500)(10)(350) \approx 5 \times 10^6 \frac{\text{residues}}{\text{cell hr}} \quad (1)$$

### 4.2 Ntag-beta-galactosidase calculation

Numbers and assumptions:

- $\beta$  (from single plasmid experiments) - 0.2 activity/mL hr OD
- activity to protein mass - 0.002 (mg/activity) (based on Bulletin from Sigma)
- Beta-gal molecular weight -  $7.7 \times 10^{-6}$  mol/g
- OD to cells/mL -  $1 \times 10^{-9}$  OD/(cells/mL)
- Residues in Ntag-Beta gal - 1137 residues/protein

$$(0.2)(0.002)(0.001 \frac{\text{g}}{\text{mg}})(7.7 \times 10^{-6})(1 \times 10^{-9})(6.02 \times 10^{23} \frac{\text{proteins}}{\text{mol}})(1137) \approx 2 \times 10^6 \frac{\text{residues}}{\text{cell hr}} \quad (2)$$



### 4.3 arcA-ssrA calculation

Numbers and assumptions:

- Rough number of clpX<sub>6</sub> in a cell according to Farrell et al. - 90 proteins/cell
- Vmax for ArcA with ssrA tag from McGinness et al. - 5 1/(min clpX<sub>6</sub>)  
(Note: from *in vitro* experiments)
- Residues in ArcA w/ ssrA - 240 residues/protein

$$(90)(5)(60 \frac{\text{min}}{\text{hr}})(240) \approx 6.5 \times 10^6 \frac{\text{residues}}{\text{cell hr}} \quad (3)$$
